# Supplementary material for: Retinoic acid-gated BDNF synthesis in neuronal dendrites drives presynaptic homeostatic plasticity
Source: eLife. 2022 Dec 14;11:e79863. doi: 10.7554/eLife.79863 (PMC9797192; doi:10.7554/eLife.79863)
Supplement: Figure 1—figure supplement 1—source data 1. [file elife-79863-fig1-figsupp1-data1.xlsx]

## Sheet: Fig S1A
interval (ms)	DMSO																		interval (msec)	AVE	SEM	N
50	1.17927	1.37362	1.38469	1.1587	1.24676	1.21169	1.83018	1.73455	2.28105	0.990934	1.88178	1.7441	1.919	1.43025	1.53298	1.69444			50	1.53712	0.0873616	16
100	1.20841	1.11345	1.18191	1.16553	1.64268	1.16232	1.64691	1.50672	2	1.1473	1.36747	1.48204	1.6633	1.50057	1.29826	1.55992			100	1.41543	0.0629914	16
200	1.1001	1.0253	1.17772	0.939694	0.879323	0.83535	1.25996	1.01834	1.44634	1.03227	1.56735	1.52576	1.52763	1.4022	1.51839	1.41916			200	1.22968	0.0643743	16
400	0.887928	0.934492	1.00639	0.699039	0.597995	0.921945	1.10821	1.15849	1.10838	1.25007	1.07976	1.52503	1.23834	1.22688	1.1243	1.07698			400	1.05901	0.0556116	16
	RA
50	0.285581	0.331834	0.71772	0.465971	0.42275	1.65527	1.48005	0.950131	1.29507	0.981896	1.37942	1.25997	1.16352							0.953015	0.129452	13
100	0.484497	0.630062	0.817786	0.688239	0.588996	1.22758	1.00612	0.854111	1.41365	0.989871	1.56893	1.38866	1.43244							1.007	0.101506	13
200	0.596288	0.793658	0.928507	0.411589	0.433566	0.968258	1.29305	0.93314	1.11634	0.980299	1.17314	1.08766	1.45181							0.935946	0.0866574	13
400	0.593365	0.760127	0.782979	0.816524	0.668831	0.998671	1.29265	0.897078	1.09337	1.01218	0.993074	0.884524	1.0209							0.90879	0.0521399	13

## Sheet: Fig S1B
	DMSO FR-60	DMSO FR+40			RA FR-60	RA FR+40
	84	60			36	20
	26	46			26	54
	36	42			46	32
	52	48			70	56
	44	40			46	34
	60	24			54	72
	54	60			70	44
	62	64			34	50
	56	74			36	52
	82	70			40	48
	40	64			58	54
	44	74			58	74
	44	46			36	48
	46	56			46	60
	58	56
	58	76
	28	62
AVE	51.4118	56.5882			46.8571	49.8571
SEM	3.86068	3.41607			3.61142	3.89118
N	17	17			14	14

## Sheet: Fig S1D
RARa cKO/RA	pool uni DMSO	Pool uni RA	Pool post del RARa DMSO	Pool post del RARa RA					pool uni DMSO	Pool uni RA	Pool post del RARa DMSO	Pool post del RARa RA
	8.43739	7.11263	7.622	9.39986					0.56	0.21	0.48	0.97
	8.86536	7.28607	9.60758	9.5456					0.62	0.25	0.54	1.37
	10.393	7.86034	9.67723	9.79017					0.84	0.58	0.6	1.48
	10.4285	8.06782	9.6805	9.82742					1.55	0.93	0.6	1.56
	10.4875	8.79182	10.7297	10.6018					1.76	0.95	0.87	1.7
	11.1496	9.87914	10.8171	10.6041					1.82	0.97	1.37	1.88
	12.7114	9.97208	11.7194	10.7389					1.87	1.01	1.79	2.02
	12.9106	10.0747	11.7599	10.9755					1.92	1.01	1.85	2.13
	12.99	10.1238	11.7663	11.3774					1.92	1.08	1.94	2.27
	13.4259	10.1342	11.9115	11.451					1.98	1.17	2.11	2.28
	14.0015	10.2826	11.9918	11.6345					2.08	1.19	2.58	2.28
	15.1667	10.5143	12.0495	12.0296					2.23	1.19	2.73	2.35
	15.3307	10.7958	12.0526	12.5739					2.31	1.2	3.34	2.56
	15.3911	10.9679	12.2314	12.7078					2.41	1.2	3.48	2.6
	15.4403	11.4735	13.3231	12.9768					2.64	1.22	3.56	2.9
	16.0463	11.954	16.5211	13.5214					2.69	1.22	3.77	2.91
	16.3051	12.0171	17.0653	13.6518					2.88	1.25	3.8	2.94
	16.5857	12.1435	18.095	13.7121					2.89	1.25	4.2	3.14
	17.3242	12.349	19.4239	14.5634					3.12	1.37	4.2	3.19
	17.8804	12.3659	20.8025	15.8908					3.24	1.4	4.23	3.2
	18.5582	12.392	23.6501	16.0356					3.27	1.4	4.26	3.8
	18.9201	12.9102	23.7073	16.1194					3.39	1.41	4.55	4.43
	19.1426	12.9835	24.2568	16.433					3.6	1.78	5.34	4.46
	19.1689	13.0415	26.7878	18.8807					3.74	1.91	5.88	4.62
	20.6898	13.5554	30.9538	19.3312					3.74	2.18	6.45	4.83
	21.0711	13.6827	32.237	21.0095					3.81	2.33	7.25	4.94
	21.3566	13.8049	33.7691	21.442					4	2.37	8.7	5.12
	21.386	15.1785		25.3763					4.19	2.37		5.28
	21.5311	15.2216		25.4984					4.2	2.39		5.28
	24.1315	15.2367		26.1067					4.26	2.39		5.43
	24.1801	15.5508		26.9624					4.29	2.43		5.7
	24.9986	16.394		29.4497					4.56	2.55		6.29
	25.2075	17.2844							4.82	2.86
	25.2759	18.0815							4.96	2.89
	26.0434	19.2391							5.48	2.96
	26.6461	19.279							5.5	2.96
	28.8609	19.3162							5.55	3.2
	29.1541	19.7574							5.73	3.2
	29.1884	30.8891							5.77	4.12
	29.2925								6.36
	30.5637								7.06
	30.9017								7.83
	34.6662								8.43
AVE	19.5862	13.2811	16.8226	15.6318					3.62488	1.75256	3.35074	3.30969
SEM	1.04196	0.719756	1.46807	1.02978					0.283752	0.144887	0.412149	0.263126
N	43	39	27	32					43	39	27	32
