# Supplementary material for: Retinoic acid-gated BDNF synthesis in neuronal dendrites drives presynaptic homeostatic plasticity
Source: eLife. 2022 Dec 14;11:e79863. doi: 10.7554/eLife.79863 (PMC9797192; doi:10.7554/eLife.79863)
Supplement: Figure 2—figure supplement 1—source data 1. [file elife-79863-fig2-figsupp1-data1.xlsx]

## Sheet: Figure S2A
Whole hippocampi
	P0	P7	P14	P21	P28
Replicate 1	100	471.053	1028.9	1234.87	1625.75
Replicate 2	100	404.873	1547.95	2301.07	2500.44
Replicate 3	100	527.953	1068.12	2074.35	2578.49

## Sheet: Figure S2E
Synaptoneurosome: GluA1
DMSO	RA
95.7821	160.346
87.6673	154.922
104.177	190.73
112.374	144.116

## Sheet: Figure S2F
Synaptoneurosome: PSD95
DMSO	RA
103.525	106.699
100.259	104.227
96.2164	103.795
