# Supplementary material for: Retinoic acid-gated BDNF synthesis in neuronal dendrites drives presynaptic homeostatic plasticity
Source: eLife. 2022 Dec 14;11:e79863. doi: 10.7554/eLife.79863 (PMC9797192; doi:10.7554/eLife.79863)
Supplement: Figure 2—source data 1. [file elife-79863-fig2-data1.xlsx]

## Sheet: Figure 2A
ProBDNF expression profiles in cultured hippocampal slices collected at 1, 7, 14, and 21 days in culture.
Slice culture
	DIV 1	DIV 7	DIV 14	DIV 21
Replicate 1	100	211.818	593.79	852.637
Replicate 2	100	187.127	533.278	1035.72
Replicate 3	100	168.765	315.047	579.021

## Sheet: Figure 2E
induced pro-BDNF synthesis in synaptoneurosomal fraction following 30 minutes of RA treatment
Synaptoneurosome: ProBDNF
DMSO	RA
52.1566	181.092
139.813	192.92
92.6483	213.536
115.382	133.659
