# Supplementary material for: Retinoic acid-gated BDNF synthesis in neuronal dendrites drives presynaptic homeostatic plasticity
Source: eLife journal article supplement (doi:10.7554/elife.79863), 2022-12-14
Supplement: supp [file elife_poa_e79863_Figure_1_source_data_1.xlsx]

## Sheet: Fig 1B
Quantification of mEPSC amplitudes and frequencies recorded from WT, presynaptic and postsynaptic RARα KO neurons treated with DMSO or RA.
RARa cKO/RA	mEPSC amp	pool uni DMSO	pool uni RA	pool PRE DMSO	Pool PRE RA	Pool Post DMSO	Pool Post RA	mEPSC freq	pool uni DMSO	pool uni RA	pool PRE DMSO	Pool PRE RA	Pool Post DMSO	Pool Post RA
		7.80386	10.0611	8.24855	8.93862	7.75462	8.50965		0.16	0.57	0.13	0.38	0.2	0.21
		8.44762	10.2058	8.26746	9.22207	8.05827	8.66324		0.19	0.64	0.35	0.52	0.23	0.21
		8.46135	10.4711	8.30351	9.58074	8.90503	8.67889		0.27	0.7	0.35	0.52	0.42	0.27
		8.48282	10.8805	8.69054	9.65953	9.09951	8.80849		0.27	0.73	0.36	0.56	0.51	0.31
		9.00271	11.1699	8.97381	9.68274	9.45597	9.14863		0.38	0.74	0.38	0.61	0.56	0.35
		9.0719	11.5632	9.06435	9.6901	10.1356	9.25693		0.44	0.79	0.39	0.73	0.68	0.43
		9.3089	11.7488	9.10307	10.3216	10.2958	9.44332		0.52	0.83	0.4	0.75	0.87	0.57
		9.92171	11.8359	9.18266	10.3364	10.3057	9.83723		0.54	0.91	0.41	0.8	0.88	0.61
		10.1628	11.8995	9.18334	10.3414	10.3322	10.1249		0.58	0.92	0.41	0.93	0.89	0.65
		10.3112	12.1246	9.23297	10.3809	10.494	10.1691		0.66	0.94	0.41	1.01	0.92	0.74
		10.3592	12.2488	9.44024	10.4428	10.4985	10.7716		0.69	0.95	0.51	1.03	0.98	0.79
		10.6922	12.3377	9.56461	10.5558	10.5732	10.8709		0.75	1.03	0.56	1.23	1.01	0.79
		10.7464	12.4942	9.73716	11.0634	10.711	10.8988		0.93	1.09	0.58	1.32	1.01	0.8
		10.8613	12.6684	10.0444	11.1285	10.9154	10.9004		0.94	1.09	0.6	1.43	1.01	0.85
		11.3383	12.9684	10.2005	11.73	11.0929	10.901		0.99	1.1	0.6	1.44	1.03	0.86
		11.3594	13.1144	10.2835	11.901	11.1422	10.9524		1.01	1.1	0.61	1.5	1.11	0.93
		11.3826	13.214	10.4376	11.9525	11.2896	11.0131		1.08	1.15	0.64	1.52	1.13	0.94
		11.7049	13.4551	10.5048	12.0302	11.3149	11.1749		1.09	1.21	0.65	1.53	1.13	0.96
		11.992	13.6276	10.5133	12.0669	11.3456	11.3108		1.12	1.38	0.65	1.6	1.19	0.98
		12.0792	13.6949	10.6035	12.5158	11.4089	11.4565		1.17	1.42	0.67	1.69	1.2	1.04
		12.1043	14.0616	10.6279	12.5526	11.5087	11.4802		1.25	1.44	0.69	1.75	1.21	1.05
		12.3785	14.7255	10.7196	12.5993	11.531	11.7071		1.43	1.45	0.72	1.92	1.23	1.06
		12.6873	14.9242	10.9517	12.6877	11.5527	12.2741		1.48	1.5	0.85	1.95	1.26	1.09
		12.8045	15.1265	11.0077	13.0076	11.6827	12.3214		1.53	1.53	0.86	2	1.32	1.11
		12.8049	15.5412	11.121	13.0584	11.7401	12.8048		1.67	1.56	0.92	2.11	1.32	1.11
		12.9811	16.3219	11.2144	13.6777	11.9211	12.8984		1.78	1.61	0.96	2.31	1.35	1.12
		13.1113	16.4511	11.2215	13.7473	11.9849	12.9079		1.82	1.68	1	2.52	1.38	1.16
		13.8079	16.4521	11.3059	14.3815	12.219	12.9237		2.3	1.82	1.01	2.64	1.39	1.17
			16.4539	11.3797	14.7402	12.4302	13.1022			2.04	1.02	2.82	1.39	1.18
			17.1738	11.6857	14.9262	12.8738	13.2932			2.18	1.09	2.97	1.46	1.19
			17.4317	11.7317	15.7729	12.942	14.0403			2.68	1.09	3.43	1.76	1.37
			22.2334	12.0519	16.2184	13.1355	14.0471			2.69	1.12	3.57	1.78	1.53
			23.5417	12.0586	16.5683	13.8751	14.5096			2.87	1.15	3.85	1.87	1.59
			24.4954	12.2512	17.0025	14.035	15.1276			4.76	1.27	4.44	1.89	1.77
			27.0996	12.4956	17.6142	14.1405	15.9822			6.3	1.27	5.23	2.01	1.82
				12.6804	19.157	15.4947	16.3166				1.33	5.56	2.09	1.92
				13.2287	22.296	18.579	16.4722				1.33	6.04	2.42	1.96
				14.0271			16.531				1.44			1.96
				14.5187			17.4191				1.72			2.05
							18.3412							2.57
							21.6829							2.91
AVE		10.9346	14.6805	10.6631	12.7986	11.5345	12.4164		0.965714	1.58286	0.782051	2.05973	1.19162	1.12146
SEM		0.314273	0.692868	0.24703	0.498153	0.331627	0.462259		0.104338	0.196176	0.0594579	0.24043	0.0823451	0.0963394
N		28	35	39	37	37	41		28	35	39	37	37	41

## Sheet: Fig 1C
Quantification of mEPSC amplitudes and frequencies recorded from WT, presynaptic and postsynaptic RARα KO neurons treated with DMSO or CNQX (36 hours).
RARa cKO/CNQX	mEPSC amp	pool uni control	pool uni CNQX	pool Pre control	pool Pre CNQX\	pool Post control	pool Post CNQX		mEPSC freq		pool uni control	pool uni CNQX	pool Pre control	pool Pre CNQX\	pool Post control	pool Post CNQX
		8.52955	9.60623	7.9883	10.0189	7.75462	8.21983				0.26	0.18	0.11	0.47	0.16	0.19
		8.63459	9.89261	8.18728	10.0848	8.80343	8.30944				0.26	0.33	0.19	0.56	0.2	0.23
		8.85495	10.0478	8.9668	10.2596	9.45597	8.74763				0.28	0.45	0.24	0.6	0.2	0.25
		8.85944	10.0626	9.09346	10.4448	9.63995	9.49737				0.32	0.66	0.3	0.62	0.33	0.36
		9.13372	10.2799	9.18614	10.8428	9.90748	9.51512				0.41	0.7	0.34	0.76	0.38	0.51
		9.29385	10.7623	9.29347	10.8929	9.99412	9.55448				0.43	0.71	0.41	0.8	0.42	0.56
		9.78516	10.8332	9.34275	10.9896	10.1356	9.86759				0.45	0.75	0.43	0.8	0.43	0.63
		9.81823	10.9873	9.4487	11.569	10.4421	9.8806				0.47	0.78	0.46	0.82	0.5	0.66
		9.90459	10.9968	9.85253	11.6864	10.4793	9.96781				0.49	1.04	0.5	1.03	0.5	0.66
		10.2232	11.5751	9.94002	12.0998	11.2973	10.5551				0.52	1.07	0.56	1.04	0.58	0.67
		10.48	11.6263	10.052	12.2756	11.6887	10.8265				0.55	1.09	0.6	1.19	0.6	0.7
		10.5548	11.8805	10.185	12.3306	11.8769	11.3192				0.55	1.1	0.61	1.2	0.64	0.72
		10.632	12.1629	10.2663	13.0985	11.9922	11.8166				0.57	1.16	0.63	1.23	0.73	0.75
		10.7253	12.3348	11.422	13.3896	12.0642	11.8704				0.62	1.21	0.69	1.35	0.73	0.83
		10.7271	12.5739	11.5765	14.5622	12.1504	12.4843				0.64	1.27	0.71	1.42	0.87	0.92
		10.7415	12.5979	11.625	15.1092	12.2907	12.9635				0.68	1.3	0.74	1.59	0.9	0.93
		11.3494	12.9614	11.7371	16.3768	12.542	13.0842				0.72	1.31	0.75	1.67	0.9	0.97
		11.4219	13.0858	11.7507	16.96	12.7612	13.2268				0.74	1.36	0.76	1.68	0.93	1.16
		11.8028	13.183	12.2139	17.6676	13.6294	13.2851				0.76	1.44	0.76	2.33	0.95	1.33
		11.9716	13.3921	12.5238	20.4206	13.9711	13.4285				0.79	1.46	0.88	2.48	1.08	1.52
		12.0616	13.8362	13.299	20.4379	14.458	13.6421				0.85	1.58	0.89	2.55	1.1	1.64
		12.31	16.7921	13.4232	28.2412	14.9307	13.8537				0.85	1.82	1.1	2.75	1.38	1.65
		12.7995	18.5833	14.6366	32.5816	15.0106					1.15	1.82	1.2	4.24	1.5
		13.0104	18.9192	16.9341							1.21	1.82	1.77
			19.4545									2.97
	ave	10.5677	12.7371	10.956	14.8843	11.6207	11.178				0.607083	1.1752	0.65125	1.44261	0.696087	0.810909
	sem	0.270194	0.565328	0.438211	1.21786	0.410863	0.397114				0.0511338	0.116759	0.0735298	0.188895	0.0760012	0.0913367
	n	24	25	24	23	23	22				24	25	24	23	23	22
