# Supplementary material for: Retinoic acid-gated BDNF synthesis in neuronal dendrites drives presynaptic homeostatic plasticity
Source: eLife journal article supplement (doi:10.7554/elife.79863), 2022-12-14
Supplement: supp [file elife_poa_e79863_Figure_3_source_data_1.xlsx]

## Sheet: Fig 3B
Quantification of mEPSC amplitudes and frequencies recorded from WT, presynaptic and postsynaptic BDNF KO neurons treated with DMSO or RA.
BDNF cKO/RA	mEPSC amp	pool uni control	pool uni RA	pool PRE control	pool PRE RA	Pool Post control	Pool Post RA		mEPSC freq	pool uni control	pool uni RA	pool PRE control	pool PRE RA	Pool Post control	Pool Post RA
		8.49383	10.1639	8.63602	9.69207	8.16875	9.1			0.11	0.47	0.2	0.32	0.14	0.2
		8.6269	10.2922	8.80546	10.4415	8.81201	9.42963			0.14	0.53	0.26	0.35	0.16	0.3
		8.62781	10.687	8.87784	11.0992	8.95048	9.78115			0.16	0.56	0.26	0.39	0.2	0.3
		8.85587	11.4311	9.26851	11.1358	8.96897	9.95148			0.22	0.57	0.27	0.48	0.21	0.32
		8.95329	12.1087	9.50588	11.3972	9.4269	10.2127			0.23	0.57	0.27	0.51	0.26	0.35
		8.9536	12.6915	9.82669	11.579	9.53111	10.6916			0.27	0.59	0.28	0.55	0.27	0.37
		9.05889	12.8683	9.93713	11.6545	9.64298	10.7437			0.27	0.6	0.32	0.55	0.29	0.38
		9.29486	13.2383	9.95308	11.8878	9.68688	12.0038			0.29	0.62	0.33	0.6	0.32	0.42
		9.32852	13.4135	10.0859	12.1687	9.75133	12.5182			0.34	0.72	0.35	0.62	0.36	0.43
		9.57014	13.9156	10.2173	12.3842	9.75942	12.779			0.4	0.73	0.36	0.68	0.41	0.52
		9.62605	14.1026	10.253	12.8564	9.97288	13.303			0.45	0.76	0.38	0.71	0.42	0.53
		9.72575	14.1492	10.257	12.9508	9.99513	13.6975			0.48	0.8	0.4	0.74	0.46	0.54
		9.74096	15.2319	10.3852	13.4029	10.3806	14.2558			0.52	1.03	0.41	0.81	0.61	0.56
		9.93787	15.5383	10.4578	13.4124	10.3938	14.3216			0.52	1.04	0.42	0.86	0.62	0.56
		9.98304	16.0942	10.6919	14.2782	10.7178	14.3442			0.53	1.07	0.42	0.9	0.67	0.57
		10.0529	16.3094	10.7057	14.6227	10.792	14.417			0.57	1.08	0.43	0.94	0.68	0.57
		10.4292	16.7244	10.9773	15.1988	10.8871	14.4905			0.57	1.09	0.43	0.95	0.68	0.59
		10.4704	16.9035	11.0103	15.5398	10.9835	14.5103			0.58	1.17	0.43	0.95	0.7	0.6
		10.7328	16.9732	11.0898	15.8479	11.0665	15.0269			0.59	1.22	0.44	0.95	0.71	0.61
		10.8359	17.0661	11.4549	16.402	11.0868	15.2627			0.59	1.25	0.44	0.99	0.72	0.62
		10.8674	18.1412	11.4606	16.6443	11.1346	15.2823			0.65	1.44	0.45	1.05	0.76	0.66
		11.0153	18.3634	11.4776	17.0118	11.2542	15.7925			0.65	1.45	0.49	1.05	0.88	0.72
		11.3477	21.4318	11.7176	18.0631	11.5986	16.0619			0.67	1.52	0.49	1.19	0.95	0.77
		11.5352	22.5584	11.751	18.0801	11.7705	16.2788			0.7	1.76	0.5	1.25	0.97	0.81
		12.0035	22.83	11.9988	18.0858	11.8587	16.3501			0.73	1.79	0.5	1.28	1.01	0.82
		12.2234	23.3661	12.1634	18.1369	12.4283	16.4483			0.74	2.03	0.55	1.34	1.03	0.83
		12.2967	23.4246	12.3257	18.8479	12.4573	17.852			0.75	2.38	0.62	1.36	1.11	0.97
		12.6271	25.5974	12.3847	18.8914	13.0223	19.106			0.79	3.36	0.66	1.41	1.12	1.02
		12.7128		12.7046	20.1442	13.3912	20.1664			0.8		0.68	1.58	1.12	1.11
		12.8293		13.1848	20.6458	13.8256	25.6093			0.92		0.71	1.7	1.18	1.21
		12.9371		13.1962	23.1222	14.3266	25.8008			1.03		0.73	2.17	1.19	2.1
		13.0026		13.2623	27.5467	15.0426				1.05		0.77	5.19	1.31
		13.2689		13.2866	29.4482	16.5795				1.1		0.87	6.5	1.67
		13.4896		13.3602	36.5745	17.8211				1.23		0.89	6.97	2.14
		13.5041		13.4176						1.26		0.93
		14.0768		13.5841						1.33		0.95
		14.4382		14.6456						1.59		0.97
		15.4672		15.249						1.83		1.44
				15.6216								1.45
				22.2113								1.51
	AVE	11.0774	16.272	11.785	16.4469	11.3378	14.6964			0.675	1.15	0.5815	1.40853	0.745	0.656774
	SEM	0.305033	0.821677	0.383642	0.997661	0.377984	0.726305			0.065023	0.124517	0.0519819	0.272591	0.0779886	0.0651869
	N	38	28	40	34	34	31			38	28	40	34	34	31

## Sheet: Fig 3C
Quantification of mEPSC amplitudes and frequencies recorded from WT, presynaptic and postsynaptic BDNF KO neurons treated with DMSO or CNQX (36 hours)
BDNF cKO/CNQX	mEPSC amp	uni controlpool	uni CNQX pool	pre Control pool	pre CNQX pool	post Control pool	post CNQX pool						mEPSC freq	uni controlpool	uni CNQX pool	pre Control pool	pre CNQX pool	post Control pool	post CNQX pool
		7.10937	8.99167	7.892	9.525	8.24717	9.70543							0.15	0.4	0.23	0.34	0.33	0.26
		8.01195	9.04783	8.13494	9.58363	8.90308	9.84783							0.2	0.5	0.25	0.35	0.41	0.33
		8.14898	9.1635	8.18601	9.72477	8.95009	9.95372							0.21	0.52	0.25	0.37	0.43	0.38
		8.34109	9.23357	8.26985	9.72556	9.182	10.0938							0.24	0.55	0.26	0.4	0.43	0.39
		8.36417	9.31483	8.36109	9.84176	9.22917	10.3231							0.26	0.61	0.28	0.42	0.47	0.4
		8.66763	9.55145	8.38962	10.0345	9.26072	11.0287							0.27	0.62	0.29	0.44	0.51	0.44
		8.77452	9.8978	8.54044	10.0656	9.29667	11.122							0.28	0.63	0.3	0.48	0.51	0.467
		8.7861	10.0585	8.67014	10.1469	9.39136	11.4212							0.29	0.64	0.35	0.51	0.55	0.51
		8.89634	10.2336	8.72761	10.165	9.45963	11.4568							0.31	0.65	0.41	0.57	0.56	0.52
		8.97694	10.306	8.73599	10.2911	9.47424	11.7702							0.32	0.68	0.44	0.58	0.59	0.54
		9.2138	10.366	8.88188	10.3016	9.62512	11.8449							0.45	0.69	0.45	0.63	0.62	0.56
		9.33919	10.42	8.9881	10.376	9.62711	11.8588							0.53	0.79	0.45	0.65	0.66	0.58
		9.39182	10.4307	9.08614	10.5312	9.62901	12.0993							0.58	0.8	0.48	0.7	0.68	0.59
		9.40284	10.4883	9.17708	10.8686	9.64056	12.2022							0.6	0.82	0.59	0.73	0.7	0.6
		9.52277	10.6808	9.2053	11.1383	9.69981	12.5055							0.6	0.85	0.61	0.94	0.71	0.62
		9.55983	10.8468	9.23042	11.14	9.80976	12.6656							0.65	0.85	0.63	0.96	0.76	0.64
		9.61307	10.8718	9.26117	11.3251	9.8838	12.9632							0.68	1.06	0.64	0.97	0.76	0.69
		9.72532	11.0797	9.30302	11.4133	10.0384	13.0041							0.76	1.07	0.65	0.99	0.76	0.71
		9.75341	11.163	9.32548	11.4218	10.1087	13.104							0.77	1.22	0.71	1.02	0.76	0.73
		9.77585	11.1793	9.33272	11.4702	10.134	13.1121							0.79	1.27	0.8	1.04	0.78	0.75
		9.87369	11.2307	9.37234	11.65	10.302	13.1215							0.83	1.36	0.81	1.06	0.86	0.78
		9.89893	11.3254	9.39603	11.711	10.4265	13.1687							0.84	1.38	0.9	1.07	0.88	0.8
		10.0335	11.5244	9.60054	12.0057	10.5606	13.1972							0.97	1.38	0.95	1.18	0.89	0.81
		10.0372	11.5787	10.0088	12.0668	10.6175	13.2013							1.03	1.39	0.95	1.29	0.9	0.85
		10.0505	11.7486	10.0248	12.2663	10.6872	13.4332							1.26	1.39	0.96	1.32	0.94	0.86
		10.1554	12.0441	10.0419	12.2907	10.9311	13.6043							1.27	1.63	1.02	1.47	0.95	0.87
		10.3505	12.1003	10.0622	12.3624	11.1469	13.9942							1.42	1.74	1.04	1.5	0.97	0.93
		10.7115	12.1176	10.1136	12.5576	11.2472	14.2627							1.49	1.77	1.06	1.66	0.99	1.05
		11.0171	12.1283	10.1716	12.8036	11.397	14.7333							1.58	1.8	1.08	1.74	1.04	1.06
		11.4875	12.9604	10.5774	12.9866	11.4441	14.9966							1.66	1.89	1.11	1.91	1.13	1.07
		11.7729	14.0218	10.595	12.9935	11.4764	15.3319							1.77	2.07	1.18	1.95	1.17	1.1
		12.2874	15.5846	10.6379	13.0354	11.4876	15.409							1.92	2.23	1.22	2.17	1.18	1.16
			15.729	10.7353	13.3931		15.4215								2.42	1.3	2.28		1.22
			16.4272	11.0374	13.5										2.92	1.31	2.35
					13.5401												2.36
					13.6267												2.39
	ave	9.59534	11.2896	9.35511	11.4411	10.0411	12.6048							0.780625	1.19382	0.704706	1.13306	0.74625	0.705061
	sem	0.195162	0.317478	0.143428	0.215666	0.151914	0.285618							0.0914136	0.107614	0.0593326	0.10894	0.0410295	0.0445223
	n	32	34	34	36	32	33							32	34	34	36	32	33

## Sheet: Fig 3E
Quantification of mEPSC amplitudes and frequencies recorded from WT, presynaptic and postsynaptic TrkB KO neurons treated with DMSO or RA.
TrkB cKO/RA	mEPSC amp		pool uni DMSO	pool uni RA	pool PRE DMSO	pool PRE RA	pool POST DMSO	pool POST RA		mEPSC freq	pool uni DMSO	pool uni RA	pool PRE DMSO	pool PRE RA	pool POST DMSO	pool POST RA
			8.41513	10.1156	8.08471	11.6467	8.2445	10.0157			0.12	0.18	0.23	0.17	0.11	0.29
			8.76627	10.3032	8.62794	11.6824	8.6953	10.5437			0.17	0.24	0.24	0.2	0.15	0.47
			8.7861	10.42	9.15384	12.8932	9.02658	10.726			0.2	0.24	0.26	0.25	0.15	0.59
			8.83251	10.8468	9.792	12.8988	9.33843	10.8015			0.2	0.26	0.27	0.28	0.15	0.7
			8.97756	11.163	10.1382	13.3317	9.59916	11.1878			0.23	0.38	0.28	0.35	0.17	0.85
			9.2138	11.3254	10.1683	13.333	9.91561	11.6506			0.23	0.41	0.29	0.37	0.19	0.85
			9.30208	11.5787	10.262	13.444	10.0528	11.7076			0.25	0.43	0.3	0.39	0.2	0.87
			9.40284	12.1283	10.3579	13.4792	10.4044	11.7691			0.27	0.52	0.32	0.4	0.22	0.93
			9.4384	12.1722	10.4021	13.6702	10.6477	11.7733			0.27	0.52	0.33	0.41	0.28	0.94
			9.5002	12.2189	10.4331	13.7119	10.6894	11.9556			0.29	0.63	0.36	0.42	0.32	1.07
			9.61307	12.6683	10.519	14.2777	10.7083	12.1017			0.29	0.64	0.37	0.45	0.4	1.13
			9.70465	12.7437	10.5717	14.3613	10.7365	12.9229			0.3	0.66	0.44	0.45	0.61	1.21
			9.76872	13.4966	11.3453	16.5097	10.7862	14.0453			0.31	0.66	0.5	0.49	0.61	1.23
			9.87369	13.6015	11.4525	16.5865	11.0261	14.5573			0.33	0.67	0.56	0.58	0.61	1.25
			10.0078	13.7995	11.8679	17.2687	11.0387	14.6751			0.33	0.69	0.57	0.6	0.64	1.37
			10.1554	14.0026	12.4404	17.5102	11.0528	15.6879			0.38	0.73	0.61	0.61	0.65	1.5
			10.2201	14.0936	12.4906	17.864	11.187	16.2027			0.43	0.77	0.65	0.61	0.67	1.54
			10.3505	14.4387	12.5762	17.9188	11.1891	16.5639			0.45	0.79	0.72	0.67	0.67	1.55
			10.4178	14.8729	12.5764	18.7665	11.3358	16.7675			0.49	0.83	0.75	0.81	0.71	1.73
			10.5256	15.0786	12.9139	19.4627	11.6795	17.0836			0.54	0.85	0.9	0.9	0.79	1.95
			10.5529	15.1003	13.1719	19.8374	11.9534	17.3475			0.55	0.99	0.9	1.13	0.79	2.07
			10.71	15.2933	13.2241	20.5098	11.9849	17.8361			0.58	1.17	1.09	1.14	0.82	2.15
			11.0789	15.5846	13.5704	22.3135	12.1257	18.4099			0.6	1.36	1.24	1.34	0.84	2.2
			11.2742	15.729	14.1606		12.3246	19.7453			0.7	1.44	1.3		0.95	2.24
			11.5541	15.7501	15.2249		12.7972	20.215			0.74	1.59	1.76		1.03	2.38
			11.5983	15.8805	16.8736		12.8342	20.4851			0.75	1.62	1.78		1.09	2.39
			11.662	18.028	18.2227		14.1995	21.5284			0.77	1.77	1.82		1.32	2.54
			11.7033	19.1589			15.5029	21.9927			0.79	1.8			1.47	2.72
			11.9267	19.4548							0.8	1.98
			12.0503	20.5412							0.83	3.69
			12.7646								0.97
			13.3458								1.02
			13.9623								1.26
			14.0977								1.47
		AVE	10.5751	14.053	11.8749	15.7947	11.1099	15.0107			0.526765	0.950333	0.697778	0.566087	0.593214	1.45393
		SEM	0.255293	0.5015	0.456973	0.637355	0.297011	0.699171			0.0559582	0.132429	0.0955332	0.0648523	0.0704465	0.12886
		N	34	30	27	23	28	28			34	30	27	23	28	28

## Sheet: Fig 3F
Quantification of mEPSC amplitudes and frequencies recorded from WT, presynaptic and postsynaptic TrkB KO neurons treated with DMSO or CNQX (36 hours).
TrkB cKO/CNQX	mEPSC amp	pool uni control	pool uni CNQX	pool Pre Control	pool Pre CNQX	pool Post Control	pool Post CNQX					mEPSC freq	pool uni control	pool uni CNQX	pool Pre Control	pool Pre CNQX\	pool Post Control	pool Post CNQX
		8.42656	8.54577	8.44494	10.0665	8.41107	9.79935						0.2	0.36	0.1	0.11	0.39	0.36
		8.75242	8.80571	8.47606	10.2971	8.45968	9.8206						0.27	0.4	0.2	0.22	0.39	0.4
		8.7861	8.96076	8.70225	10.5308	8.58159	9.95262						0.22	0.46	0.23	0.29	0.39	0.42
		9.03826	9.07301	8.75921	10.7153	8.60166	10.1619						0.34	0.51	0.3	0.29	0.4	0.45
		9.2138	9.1174	8.79988	10.7289	8.92034	10.2865						0.42	0.55	0.35	0.36	0.44	0.45
		9.40284	10.3659	8.8425	10.7902	9.28943	10.3328						0.43	0.63	0.41	0.37	0.47	0.49
		9.46999	10.42	8.9587	10.8124	9.37561	10.3459						0.44	0.69	0.45	0.37	0.47	0.61
		9.61307	10.8468	8.98292	10.9703	9.45731	10.3573						0.45	0.73	0.47	0.43	0.47	0.65
		9.86045	11.163	8.98947	11.0506	9.51454	10.4917						0.47	0.77	0.51	0.45	0.5	0.66
		9.86839	11.3254	9.14946	11.3647	9.54803	10.5443						0.48	0.79	0.53	0.47	0.51	0.68
		9.87369	11.5787	9.16361	11.7239	9.64163	10.5921						0.52	0.85	0.55	0.5	0.52	0.69
		9.93574	11.8026	9.20533	11.7828	9.65166	10.6673						0.56	0.89	0.59	0.54	0.55	0.69
		10.1349	11.915	9.31886	11.8741	9.70105	10.9704						0.57	0.93	0.61	0.54	0.57	0.71
		10.1554	12.1283	9.36635	11.8993	9.75079	11.1435						0.58	0.99	0.62	0.55	0.58	0.72
		10.3505	12.334	9.39336	12.0158	9.76758	11.1936						0.6	1.07	0.63	0.55	0.58	0.79
		10.3783	12.4436	9.76966	12.1014	9.81574	11.3051						0.71	1.16	0.67	0.56	0.59	0.82
		10.4231	12.5499	9.955	12.2532	10.065	11.3407						0.77	1.17	0.71	0.59	0.6	0.82
		10.9075	12.5536	9.97828	12.2855	10.1188	11.7792						0.79	1.31	0.71	0.62	0.66	0.89
		10.9673	12.9873	10.0846	12.3286	10.1606	12.3053						0.81	1.36	0.74	0.65	0.68	0.96
		10.982	13.0428	10.1177	12.4517	10.1906	12.5426						0.83	1.39	0.87	0.74	0.72	0.97
		11.1505	14.3516	10.2378	12.6158	10.1999	12.5426						0.85	1.74	0.92	0.75	0.77	1.1
		11.3823	14.5617	10.2691	12.659	10.4257	12.58						0.86	1.77	0.95	0.76	0.78	1.1
		11.502	14.7451	10.3838	12.898	10.4684	12.6188						0.94	1.8	1.19	0.79	0.8	1.19
		11.7712	15.5846	10.5374	12.9343	10.5611	12.6188						0.94	3.49	1.21	0.83	0.91	1.19
		12.7646	15.729	10.5896	12.9384	10.5725	12.9271						0.95	3.69	1.28	0.89	0.91	1.27
		12.7948		10.6662	13.1708	10.6697	12.9526						0.97		1.43	1.03	1.1	1.31
		13.9623		10.9347	13.1891	10.6919	13.0152						1.26		1.47	1.07	1.1	1.31
				11.0289	13.2074	11.1316	13.0152								1.49	1.1	1.11	1.68
				11.0474	13.2312	11.2585	13.7877								1.52	1.2	1.15	1.68
				11.1158	13.2498	11.5468	14.0963								1.53	1.34	1.18	1.73
				11.3872	13.5091	11.5866	14.0963								1.56	1.42	1.21	1.81
				11.5562	13.8242	11.7329	14.6539								1.59	1.74	1.27	1.85
					13.9068		14.6582									1.87		2.2
					14.453		21.3193									2.08		2.25
					14.4602											2.12
					15.8335											2.57
	ave	10.4396	11.8773	9.81913	12.3368	9.99589	12.0828						0.638148	1.18	0.824687	0.854444	0.711562	1.02647
	sem	0.255058	0.418581	0.16245	0.219193	0.158802	0.375495						0.0509456	0.167283	0.0812974	0.0987031	0.0493611	0.0901285
	n	27	25	32	36	32	34						27	25	32	36	32	34
