# Supplementary figures and images for: Retinoic acid-gated BDNF synthesis in neuronal dendrites drives presynaptic homeostatic plasticity
Source: eLife journal article supplement (doi:10.7554/elife.79863), 2022-12-14

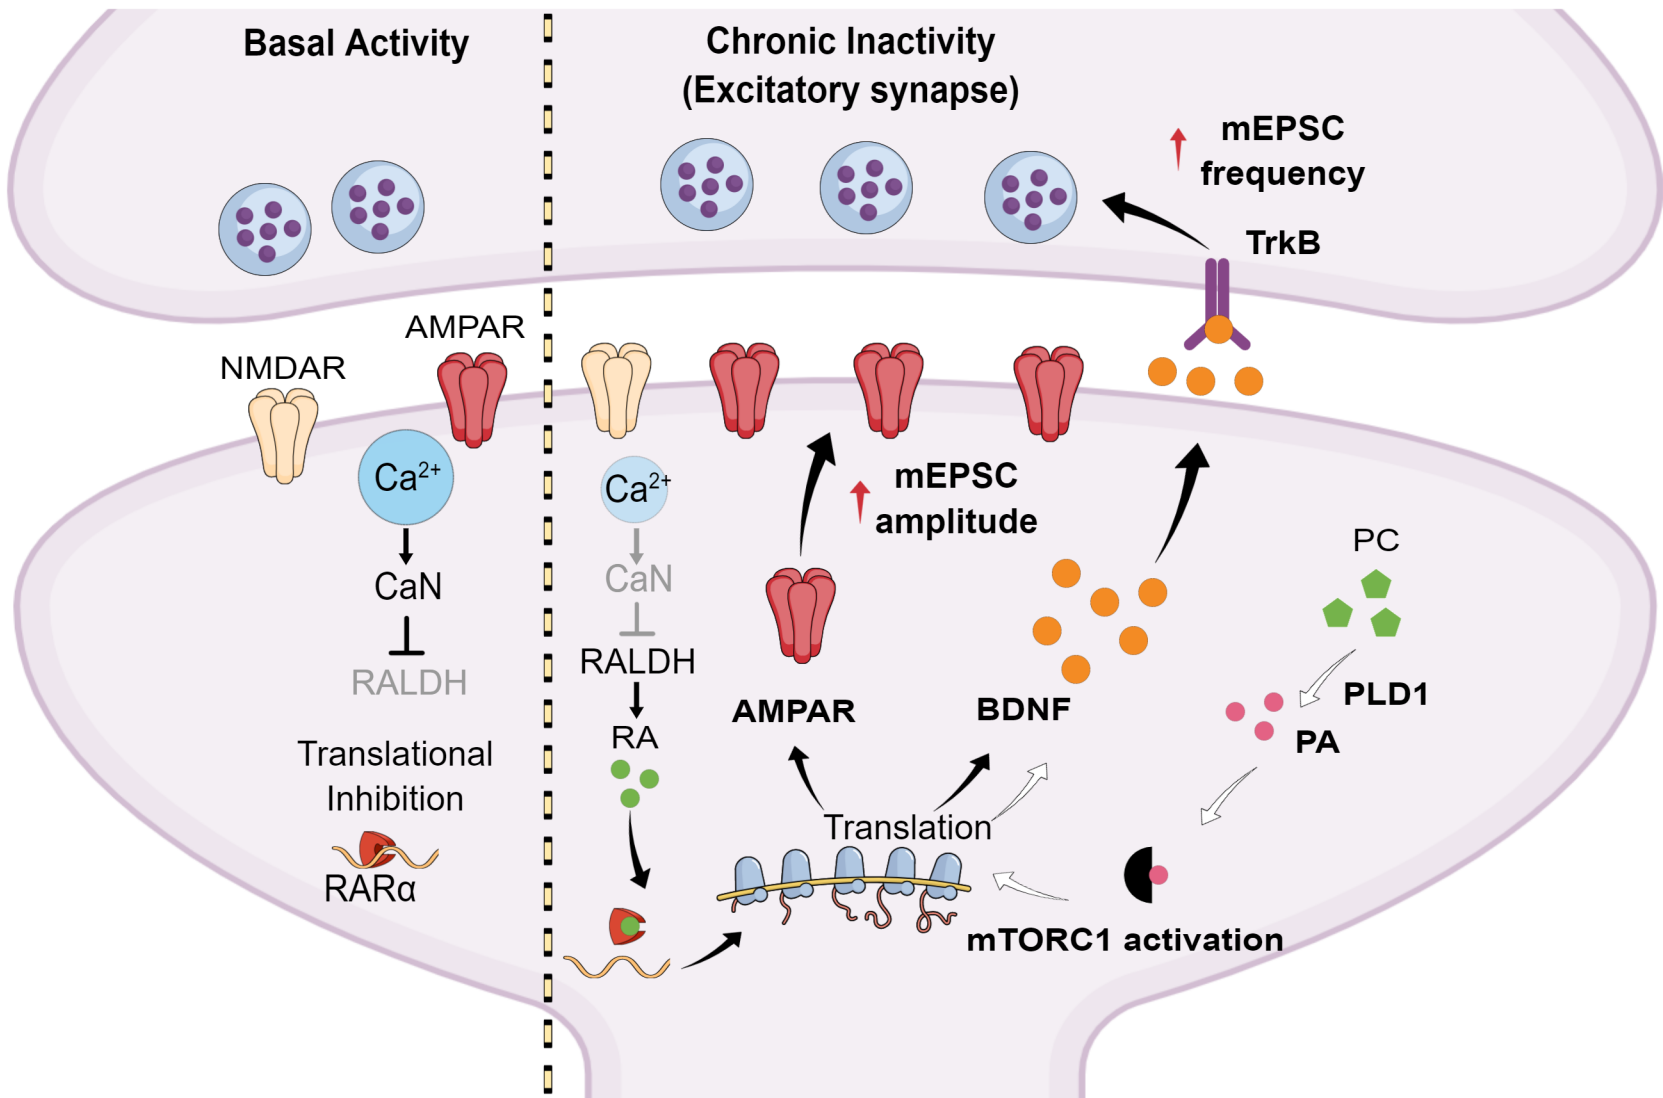

Figure 3 - figure supplement 1

Supplement: supp [file elife-79863-supp-v1.zip]

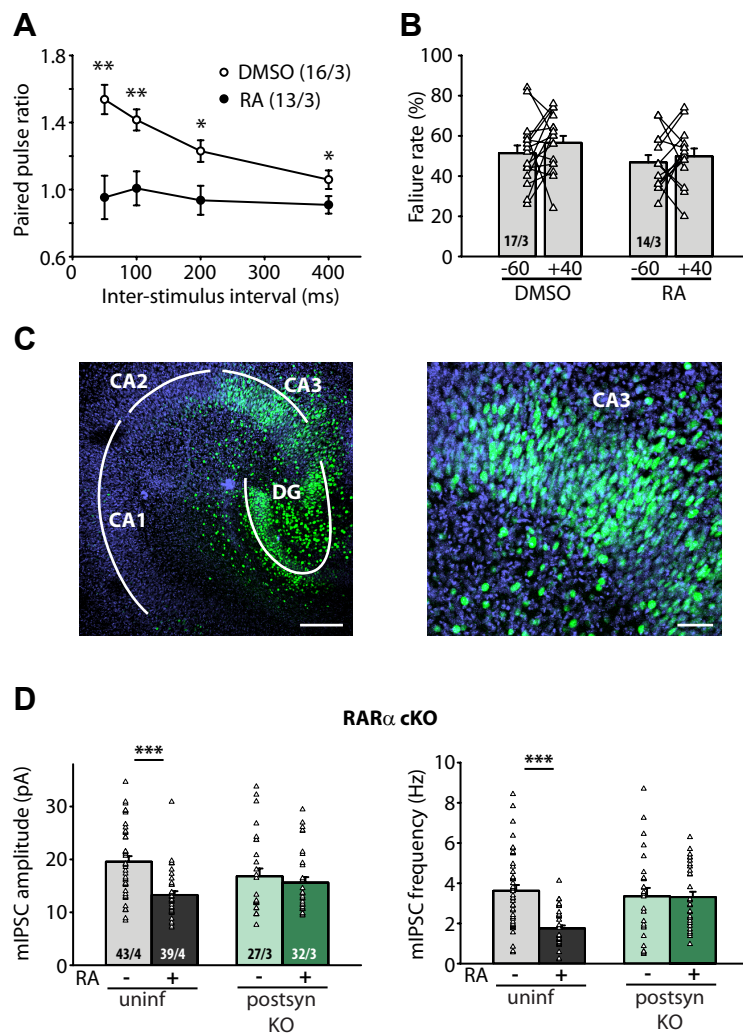

Figure 1 - figure supplement 1

Supplement: supp [file elife-79863-supp-v1.zip]

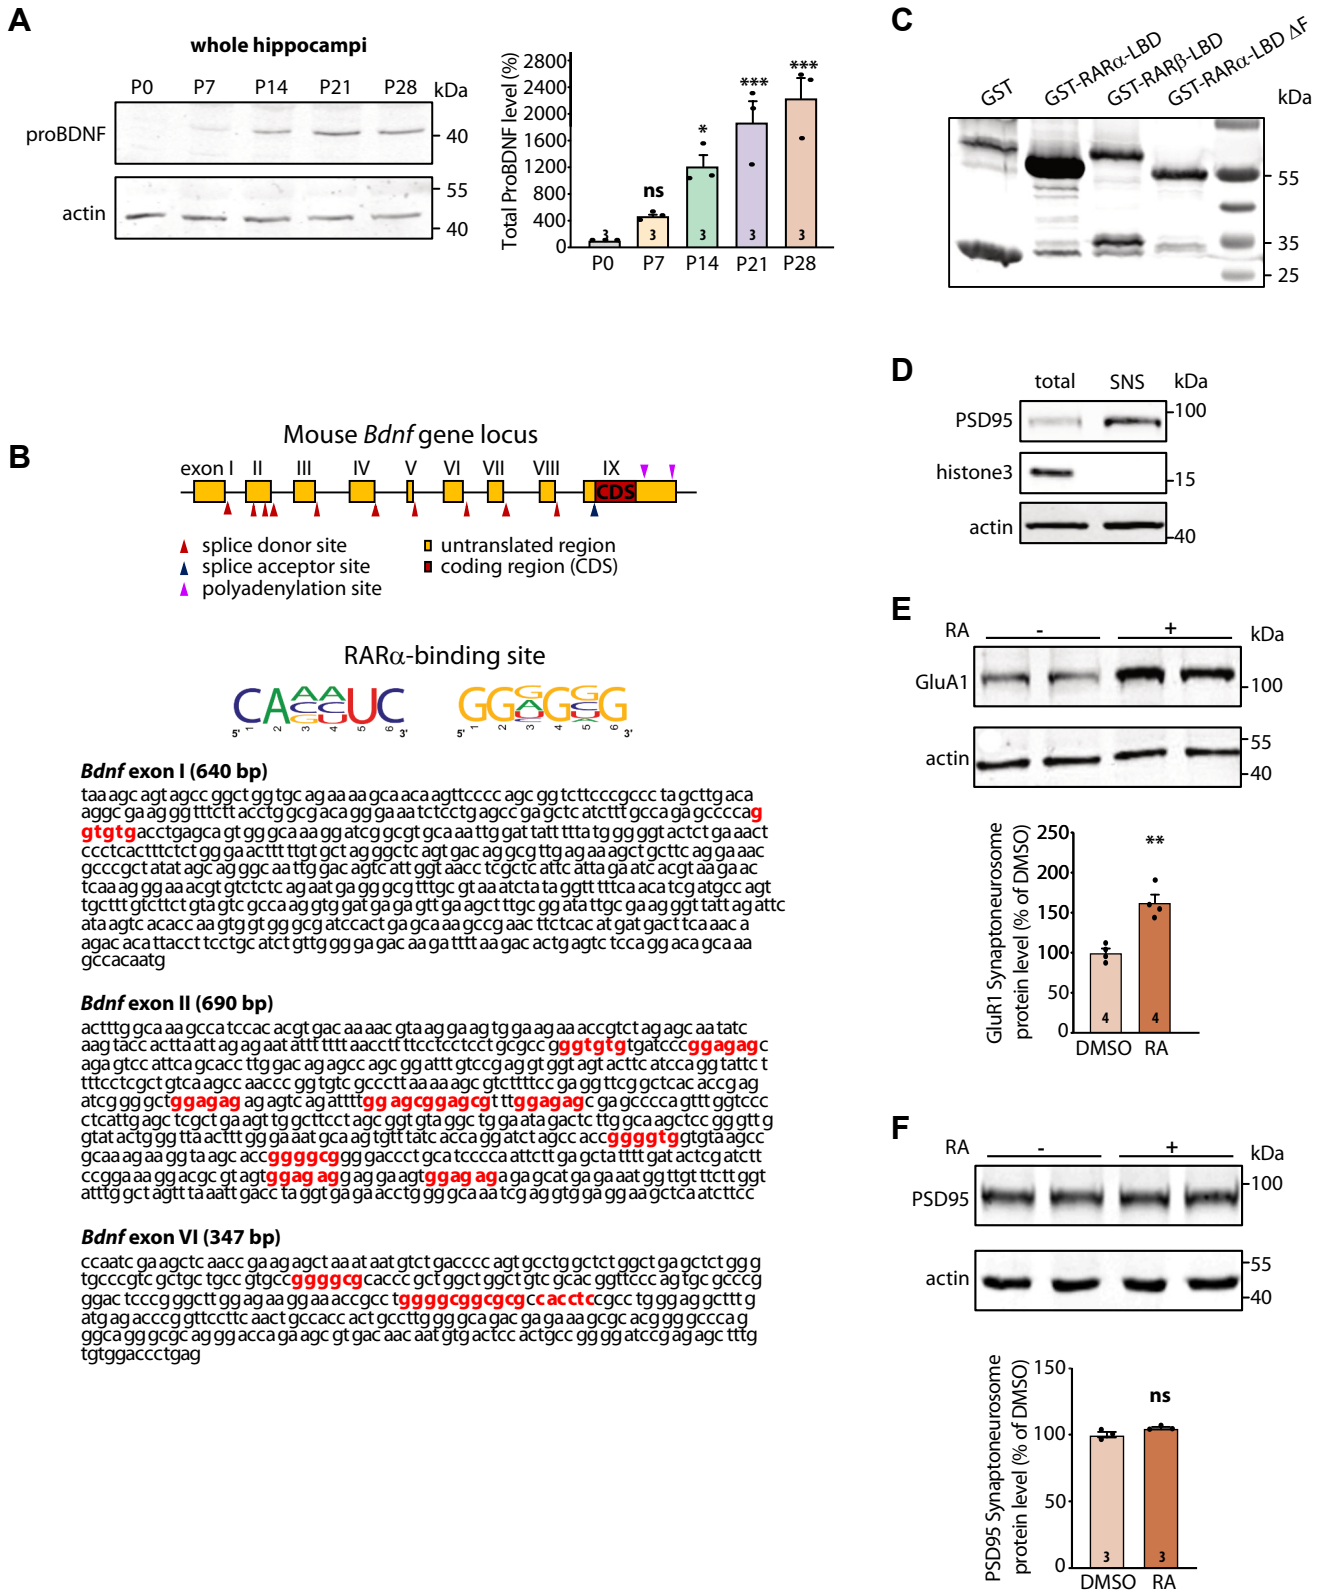

Figure 2 - figure supplement 1

Supplement: supp [file elife-79863-supp-v1.zip]
